# Supplementary material for: In Vitro Activity of 22 Antibiotics against Achromobacter Isolates from People with Cystic Fibrosis. Are There New Therapeutic Options?
Source: MDPI journal article supplement (doi:10.3390/microorganisms9122473), 2021-11-30
Supplement: s1 [file s1]

Figure S1. Picture of MIC plate result (A) with panel configuration (B) (Merlin) and picture of the inhibition zone diameter for SXT (C).

A

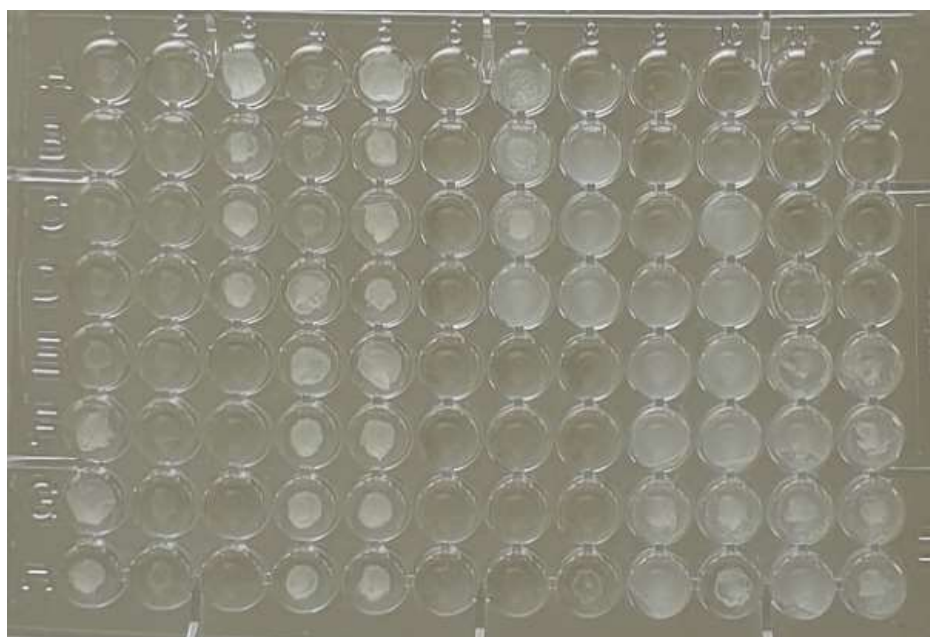

B

|   | 1          | 2            | 3            | 4           | 5          | 6            | 7          | 8         | 9           | 10          | 11            | 12           |
|---|------------|--------------|--------------|-------------|------------|--------------|------------|-----------|-------------|-------------|---------------|--------------|
| A | PIP<br>32  | PIT<br>128/4 | AZT<br>16    | CAZ<br>32   | CEP<br>8   | MER<br>16    | FOS<br>128 | AMK<br>32 | TOB<br>32   | GEN<br>32   | CIP<br>8      | LEV<br>8     |
| B | PIP<br>16  | PIT<br>64/4  | AZT<br>8     | CAZ<br>16   | CEP<br>4   | MER<br>8     | FOS<br>64  | AMK<br>16 | TOB<br>16   | GEN<br>16   | CIP<br>4      | LEV<br>4     |
| C | PIP<br>8   | PIT<br>32/4  | AZT<br>4     | CAZ<br>8    | CEP<br>2   | MER<br>4     | FOS<br>32  | AMK<br>8  | TOB<br>8    | GEN<br>8    | CIP<br>2      | LEV<br>2     |
| D | PIP<br>4   | PIT<br>16/4  | AZT<br>1     | CAZ<br>4    | CEP<br>1   | MER<br>2     | FOS<br>16  | AMK<br>4  | TOB<br>4    | GEN<br>4    | CIP<br>1      | LEV<br>1     |
| E | CAA<br>8/4 | PIT<br>8/4   | T/8<br>8/152 | CAZ<br>2    | CTA<br>8/4 | MER<br>1     | IMP<br>8   | COL<br>8  | TOB<br>2    | GEN<br>2    | CIP<br>0.5    | LEV<br>0.5   |
| F | CAA<br>4/4 | PIT<br>4/4   | T/8<br>4/76  | CAZ<br>1    | CTA<br>4/4 | MER<br>0.5   | IMP<br>4   | COL<br>4  | TOB<br>1    | GEN<br>1    | CIP<br>0.25   | LEV<br>0.25  |
| G | CAA<br>2/4 | PIT<br>2/4   | T/8<br>2/38  | CAZ<br>0.5  | CTA<br>2/4 | MER<br>0.25  | IMP<br>2   | COL<br>2  | TOB<br>0.5  | GEN<br>0.5  | CIP<br>0.125  | LEV<br>0.125 |
| H | CAA<br>1/4 | PIT<br>1/4   | T/8<br>1/19  | CAZ<br>0.25 | CTA<br>1/4 | MER<br>0.125 | IMP<br>1   | COL<br>1  | TOB<br>0.25 | GEN<br>0.25 | CIP<br>0.0625 | GC           |

C

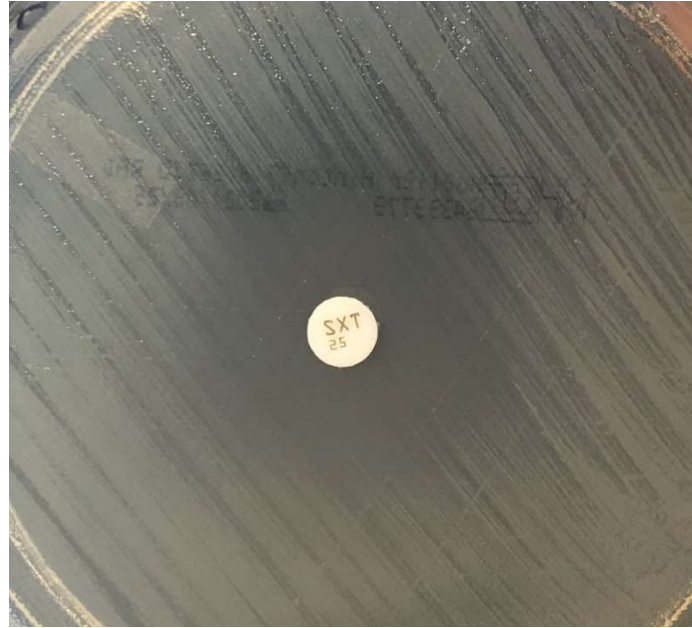

The reading of MICs was sometimes difficult, due to the non-homogeneous appearance of the well. Similarly, the fine haze in the inhibition zone made the reading of the diameter around the SXT sometimes difficult. PIP, piperacillin; CAA , ceftazidime-avibactam; PIT, piperacillin-tazobactam; AZT, aztreonam; T/S, SXT; CAZ, ceftazidime; CEP, cefepime; CTA, ceftolozane – tazobactam; MER, meropenem; FOS, fosfomycin; IMP, imipenem; AMK, amikacin; COL, colistin; TOB, tobramycin; GEN, gentamycin; CIP, ciprofloxacin, LEV, levofloxacin; GC, growth control
