# Supplementary material for: In Vitro Activity of 22 Antibiotics against Achromobacter Isolates from People with Cystic Fibrosis. Are There New Therapeutic Options?
Source: MDPI journal article supplement (doi:10.3390/microorganisms9122473), 2021-11-30
Supplement: s1 [file s1]

**Table S1.** EUCAST and CLSI breakpoints used to interpret *Achromobacter* MICs in the study.

| Antimicrobial agent       | Breakpoints         |                   |
|---------------------------|---------------------|-------------------|
|                           | EUCAST <sup>a</sup> | CLSI <sup>b</sup> |
| Piperacillin              | ≤8 / >16            | ≤16/≥128          |
| Piperacillin - tazobactam | ≤4 / >4             | ≤16/≥128          |
| Aztreonam                 | ≤4/ >8              | ≤8/32             |
| Cefepime                  | ≤4/ >8              | 8/32              |
| Ceftazidime               | ≤4/ >8              | 8/32              |
| Ceftazidime - avibactam   | ≤8/ >8              | ≤8/≥16            |
| Ceftolozane - tazobactam  | ≤4/ >4              | ≤4/≥16            |
| Cefiderocol               | ≤2/ >2              | ≤4/≥16            |
| Imipenem                  | ≤2/ >2              | ≤4/16             |
| Imipenem - relebactam     | ≤2/ >2              | ≤2/≥8             |
| Meropenem                 | ≤1 / > 4            | ≤4/16             |
| Meropenem - vaborbactam   | ≤8/ >8              | NA                |
| Ciprofloxacin             | ≤0.25/ >0.5         | ≤1/≥4             |
| Levofloxacin              | ≤0.5/ >1            | ≤2/≥8             |
| Colistin                  | ≤2/ >2              | ≤2/≥4             |
| Fosfomycin                | ≤8/ >8              | NA                |
| Gentamicin                | ≤0.5/ >0.5          | 4/16              |
| Amikacin                  | ≤1/ >1              | 16/64             |
| Tobramycin                | ≤0.5/ >0.5          | 4/16              |
| SXT <sup>c</sup>          | ≤ 0.125 / > 0.125   | 2/4               |
| Tigecycline               | ≤0.5/ >0.5          | NA                |
| Eravacycline              | 0.5                 | NA                |

<sup>a</sup>MIC were interpreted according to EUCAST breakpoints defined for *A. xylosoxidans* for piperacillin-tazobactam, meropenem and trimethoprim-sulfamethoxazole (SXT), for *Pseudomonas* for colistin, for Enterobacterales for eravacycline and according to pharmacokinetic/pharmacodynamic (non-species-related) EUCAST breakpoints for the other antibiotics. <sup>b</sup> Results were interpreted according to CLSI breakpoint defined for other non-Enterobacterales and for *P. aeruginosa* in the absence of breakpoints (for ceftazidime-avibactam, ceftolozane-tazobactam, imipenem-relebactam, cefiderocol and colistin). <sup>c</sup>SXT interpretation was based on disk diffusion method and MIC values. Different CLSI vs EUCAST breakpoints for sensitivity have been highlighted in grey. NA: not applicable.
